# Supplementary material for: The Influence of Different Recombination Pathways on Hysteresis in Perovskite Solar Cells with Ion Migration
Source: MDPI journal article supplement (doi:10.3390/inorganics11020052), 2023-01-19
Supplement: s1 [file s1]

## Supplementary materials

The influence of different recombination pathways on hysteresis in perovskite solar cells with ion migration

*Biao Li, † Kun Chen, † Pengjie Hang\*, Yuxin Yao, Chenxia Kan, Zechen Hu, Ying Wang, Yiqiang Zhang, Deren Yang, Xuegong Yu\**

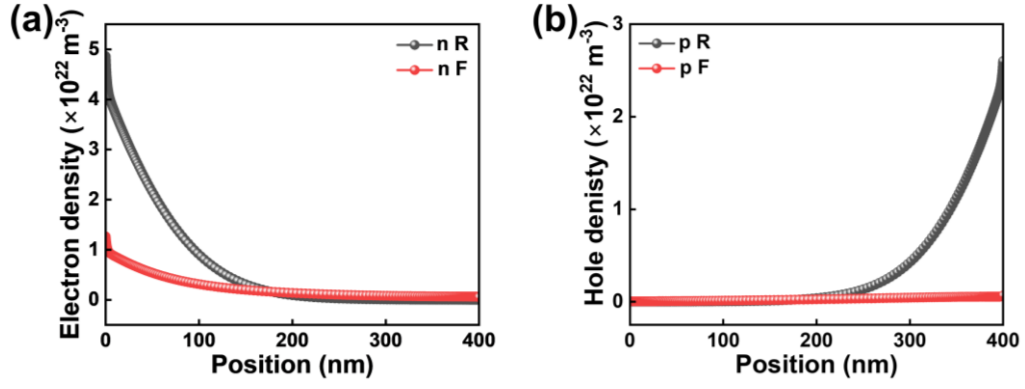

**Figure S1.** Charge carrier distribution in perovskite layers of different voltage scanning direction:

(a) electrons; (b) holes.

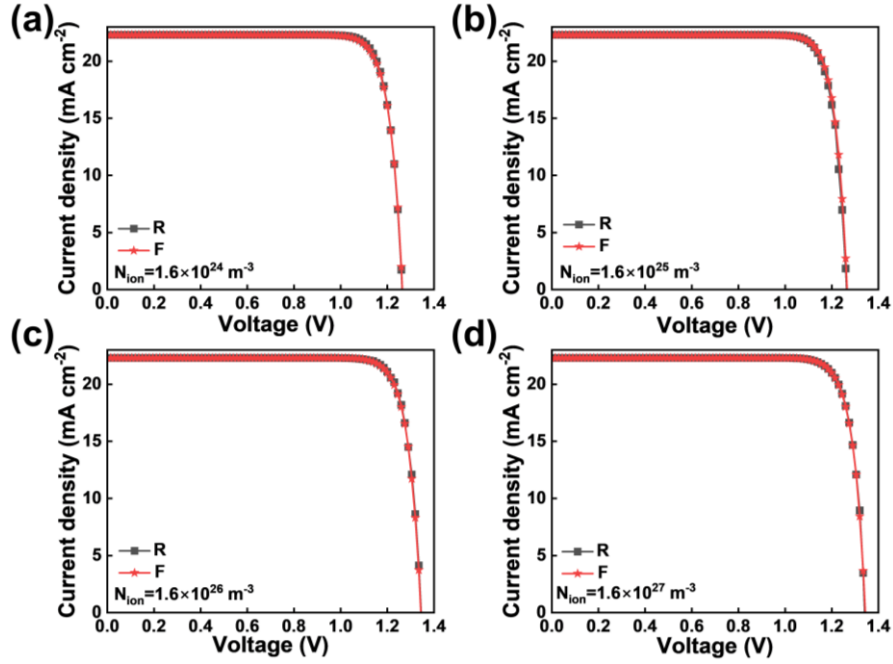

**Figure S2.** The simulation of  $J$ - $V$  curves for PSCs with same negligible recombination and with

different density of mobile ions: (a)  $1.6 \times 10^{24} \text{ m}^{-3}$ ; (b)  $1.6 \times 10^{25} \text{ m}^{-3}$ ; (c)  $1.6 \times 10^{26} \text{ m}^{-3}$ ; (d)  $1.6 \times$

$10^{27} \text{ m}^{-3}$ .

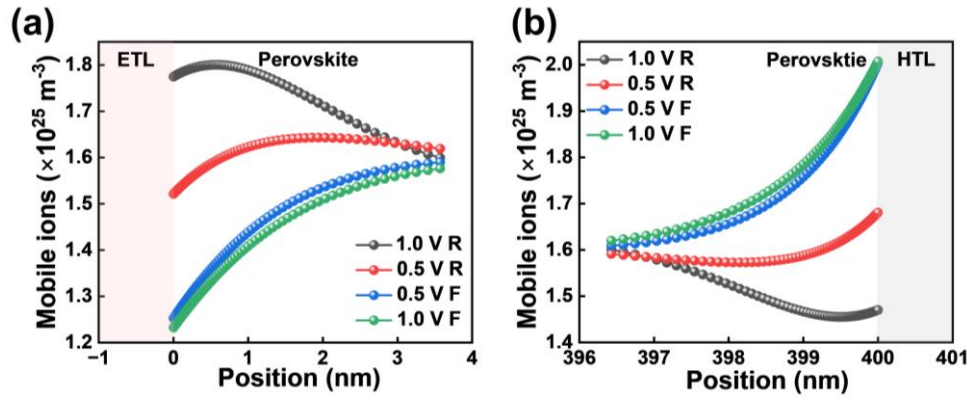

**Figure S3.** The distribution of mobile ions at different voltages near the interface between charge transporting layers and perovskite films. The density of mobile ions for the simulation is  $1.6 \times 10^{25} \text{ m}^{-3}$ . (a) ETL/Perovskite interface; (b) HTL/Perovskite interface.

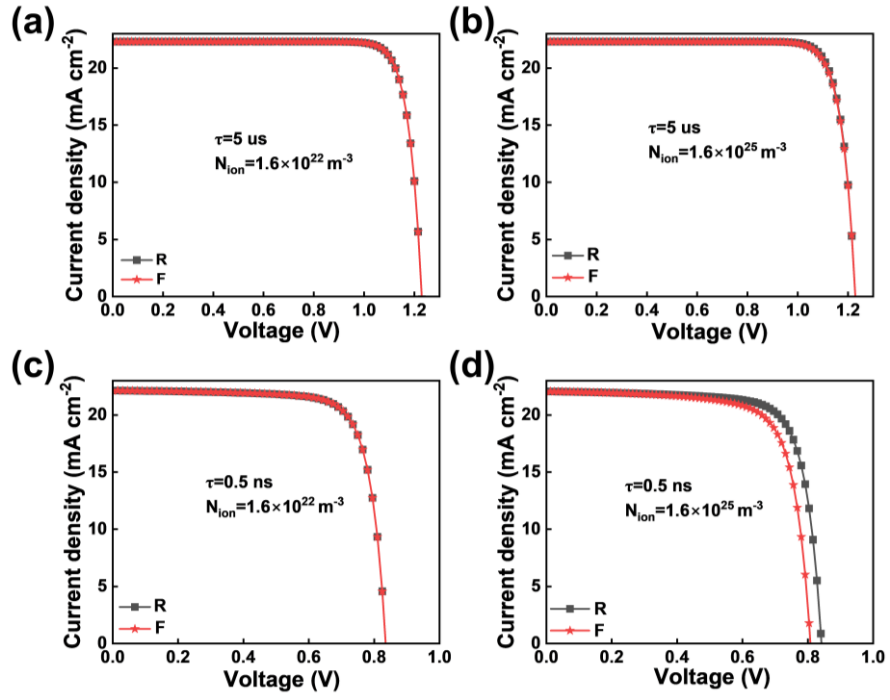

**Figure S4.** (a)  $J$ - $V$  curves for a PSC with negligible bulk recombination and negligible density of mobile ions; (b)  $J$ - $V$  curves for a PSC with negligible bulk recombination and high density of mobile ions; (c)  $J$ - $V$  curves for a PSC with severe bulk recombination and negligible density of mobile ions; (d)  $J$ - $V$  curves for a PSC with severe bulk recombination and high density of mobile ions.

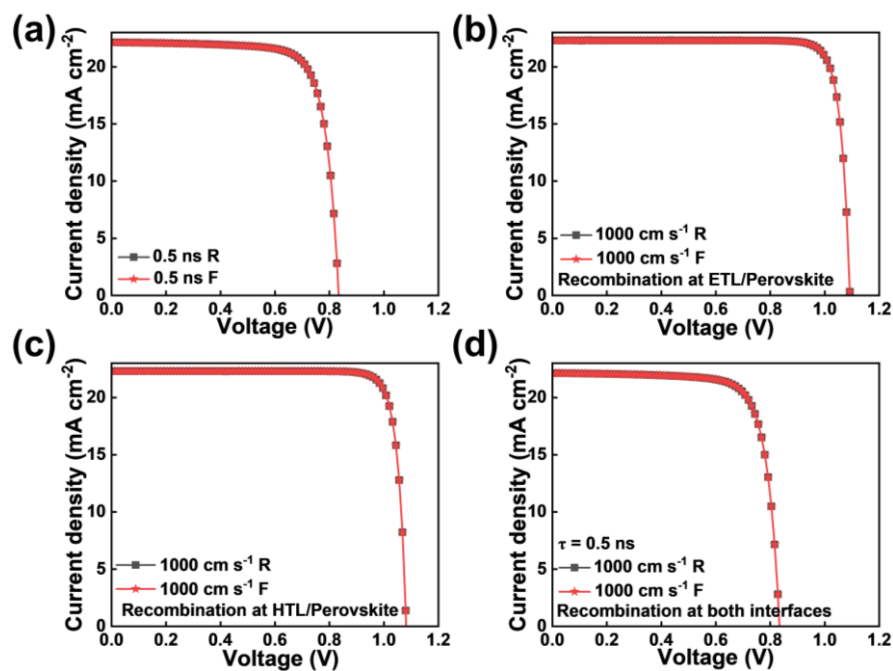

**Figure S5.** (a) only severe bulk recombination coupling with negligible ion migration; (b) only severe interface recombination at ETL/perovskite interface coupling with negligible ion migration; (c) only severe interface recombination at HTL/perovskite interface coupling with negligible ion migration; (d) severe bulk recombination with severe interface recombination at both interfaces coupled with negligible ion migration.

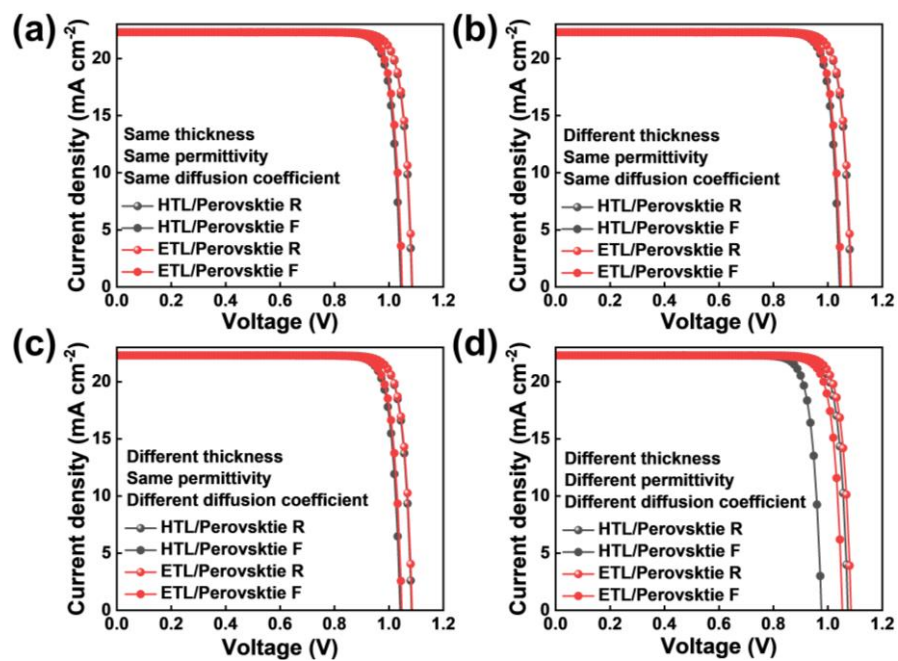

**Figure S6.**  $J$ - $V$  curves for interface recombination at ETL/Perovskite and HTL/Perovskite interface respectively: (a) same thickness, same permittivity and same diffusion coefficient for transporting layers; (b) different thickness, same permittivity and same diffusion coefficient for transporting layers; (c) different thickness, same permittivity and same diffusion coefficient for transporting layers; (d) different thickness, same permittivity and same diffusion coefficient for transporting layers.

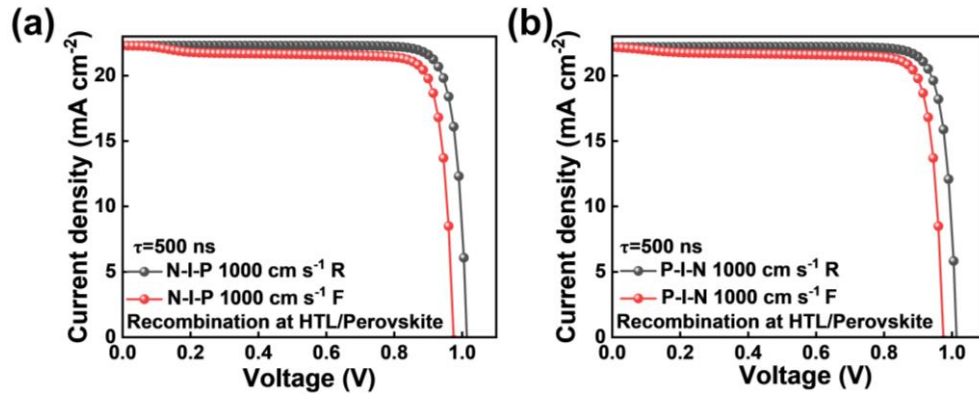

**Figure S7.**  $J$ - $V$  curves for both N-I-P and P-I-N PSCs under same condition: (a) N-I-P; (b) P-I-N.

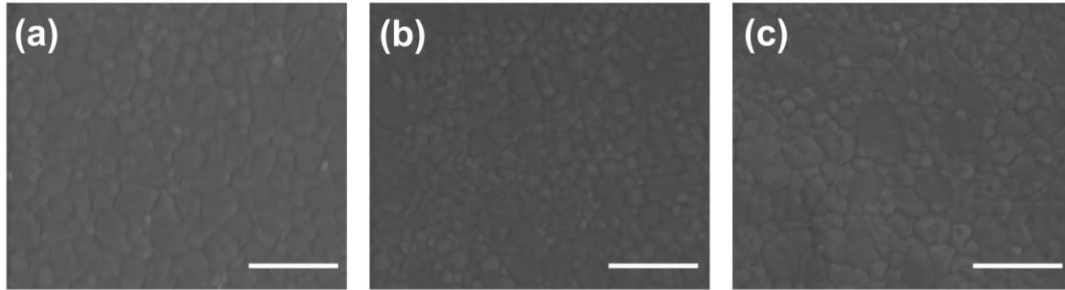

**Figure S8.** SEM images for the perovskite films on different substrates. (a)  $\text{SnO}_2$ ; (b)  $\text{SnO}_2$  NC; (c)  $\text{TiO}_2$ . The scale bar is 1  $\mu\text{m}$ .

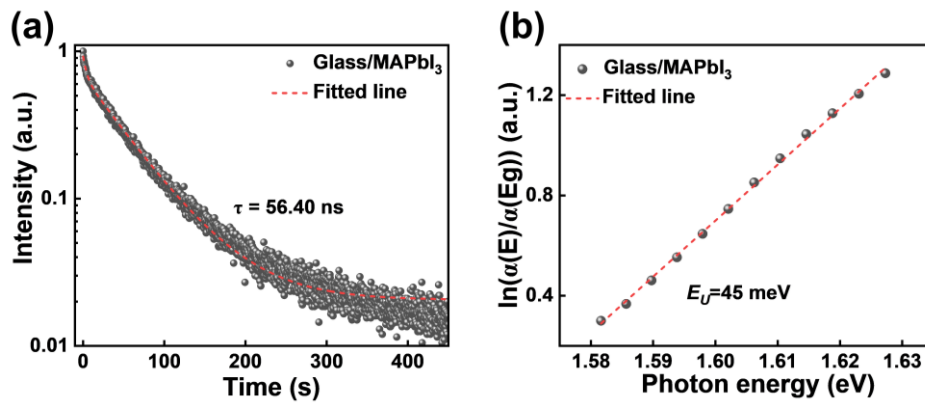

**Figure S9.** (a) TRPL data for perovskite films with the structure of glass/ $\text{MAPbI}_3$ . (b) Urbach energy for perovskite films with the structure of glass/ $\text{MAPbI}_3$ .

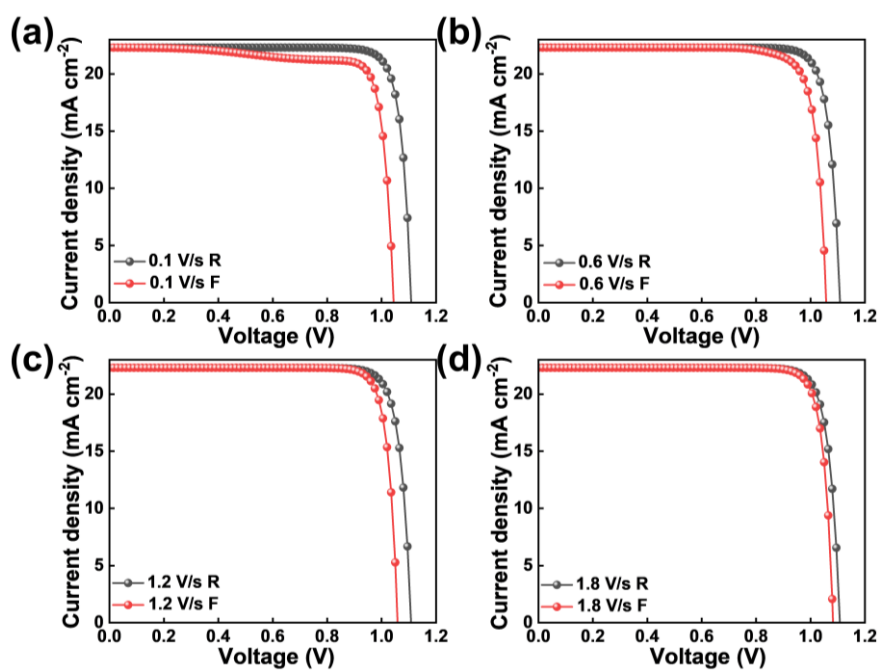

**Figure S10.** The effect of scan rates on hysteresis in PSCs. The carrier lifetime is 500 ns. The interface recombination velocity is 100 cm/s for both holes and electrons at both ETL/Perovskite and HTL/Perovskite interface. (a) 0.1 V/s; (b) 0.6 V/s; (c) 1.2 V/s; (d) 1.8 V/s.



**Table S1.** Device parameters used for simulations

| Parameter                                                 | Symbol            | Value                | Unit        |
|-----------------------------------------------------------|-------------------|----------------------|-------------|
| Thickness of HTL                                          | $d_{HTL}$         | 200                  | nm          |
| Thickness of perovskite                                   | $d_{pero}$        | 400                  | nm          |
| Thickness of ETL                                          | $d_{ETL}$         | 100                  | nm          |
| Valence band maximum of HTL                               | $E_{V,HTL}$       | -5.4                 | eV          |
| Conduction band minimum of perovskite                     | $E_{C,pero}$      | -3.9                 | eV          |
| Valence band maximum of Perovskite                        | $E_{V,pero}$      | -5.4                 | eV          |
| Conduction band minimum of ETL                            | $E_{C,ETL}$       | -3.9                 | eV          |
| Relative dielectric constant of HTL                       | $\epsilon_{HTL}$  | 3                    | /           |
| Relative dielectric constant of perovskite                | $\epsilon_{pero}$ | 24.1                 | /           |
| Relative dielectric constant of ETL                       | $\epsilon_{ETL}$  | 10                   | /           |
| Effective density of states in HTL                        | $N_{C/V,HTL}$     | $5 \times 10^{25}$   | $m^{-3}$    |
| Effective conduction band density of states in perovskite | $N_{C,pero}$      | $8.1 \times 10^{24}$ | $m^{-3}$    |
| Effective valence band density of states in perovskite    | $N_{V,pero}$      | $5.8 \times 10^{24}$ | $m^{-3}$    |
| Effective density of states in ETL                        | $N_{C/V,ETL}$     | $5 \times 10^{25}$   | $m^{-3}$    |
| Hole diffusion coefficient in HTL                         | $D_{h,HTL}$       | $1 \times 10^{-6}$   | $m^2s^{-1}$ |
| Hole diffusion coefficient in perovskite                  | $D_{h,pero}$      | $1.7 \times 10^{-4}$ | $m^2s^{-1}$ |
| Electron diffusion coefficient in perovskite              | $D_{e,pero}$      | $1.7 \times 10^{-4}$ | $m^2s^{-1}$ |
| Electron diffusion coefficient in ETL                     | $D_{e,ETL}$       | $1 \times 10^{-5}$   | $m^2s^{-1}$ |
| Effective doping density in HTL                           | $N_{A,HTL}$       | $1 \times 10^{24}$   | $m^{-3}$    |
| Effective doping density in ETL                           | $N_{D,ETL}$       | $1 \times 10^{24}$   | $m^{-3}$    |
| Density of ion vacancy                                    | $N_{ion}$         | $1.6 \times 10^{25}$ | $m^{-3}$    |
| Ion migration activation energy                           | $E_a$             | 0.5                  | eV          |
| Temperature                                               | $T$               | 298                  | K           |

The charge carrier lifetime can be fitted according to a biexponential decay function:  $I = A_1 \exp\left(-\frac{t}{\tau_1}\right) + A_2 \exp\left(-\frac{t}{\tau_2}\right)$  (Where  $I$  is the intensity of photoluminescence.  $\tau_1$  and  $\tau_2$  are the fast and slow decay lifetimes.  $A_1$  and  $A_2$  are pre-exponential factors.  $t$  is the time.). The fitting results are listed in Table S2.

**Table S2.** Fitting results of TRPL results.

|                          | $A_1$ | $\tau_1$ (ns) | $A_2$ | $\tau_2$ (ns) |
|--------------------------|-------|---------------|-------|---------------|
| Glass/MAPbI <sub>3</sub> | 0.24  | 4.27          | 0.66  | 56.40         |
